# Supplementary material for: Zwitterionic hydrogels promote skin wound healing
Source: Royal Society of Chemistry journal article supplement (doi:10.1039/c6tb00540c), 2016-01-01
Supplement: c6tb00540c1.pdf [file c6tb00540c1.pdf]

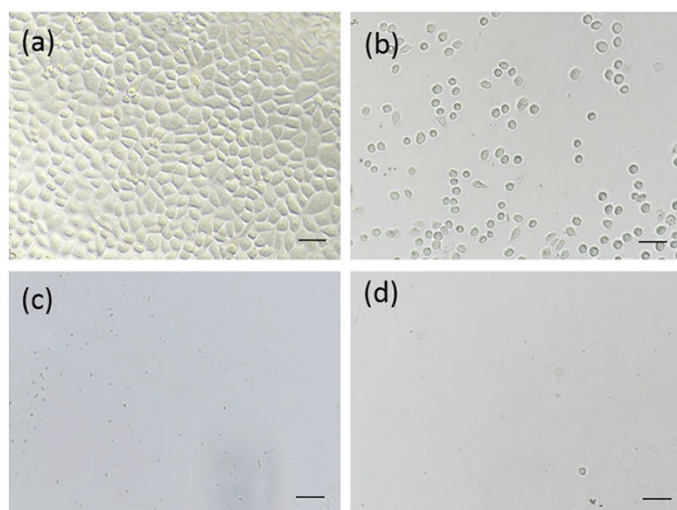

Figure.S1. Cell adhesion to hydrogels. Cell adhesion of (a) Tissue Culture Polystyrene (TCPS) (b) PHEMA hydrogels (c) PCBAA hydrogels (d) PSBMA hydrogels. Scale bar = 20  $\mu\text{m}$ .
